# Supplementary material for: An aryl-thioether substituted nitrobenzothiadiazole probe for the selective detection of cysteine and homocysteine
Source: Royal Society of Chemistry journal article supplement (doi:10.1039/c5cc01071c), 2015-01-01
Supplement: c5cc01071c1.pdf [file c5cc01071c1.pdf]

Electronic Supplementary Information (ESI) for Chemical Communications

This journal is © The Royal Society of Chemistry 2015

## **Aryl-thioether substituted nitrobenzothiadiazole probe for selective detection of cysteine and homocysteine**

Dayoung Lee,<sup>a</sup> Gyoungmi Kim,<sup>a</sup> Jun Yin,<sup>\* ab</sup> and Juyoung Yoon<sup>\*a</sup>

<sup>a</sup> Department of Chemistry and Nano Science, Ewha Womans University, Seoul, 120-750, Korea.

<sup>b</sup>Key Laboratory of Pesticide and Chemical Biology of the Ministry of Education, College of Chemistry, Central China Normal University, Wuhan 430079, People's Republic of China

jyoon@ewha.ac.kr; yinj@mail.ccnu.edu.cn

## General Methods.

Unless otherwise noted, materials were obtained from Aldrich and were used without further purification. Melting points were measured using a Büchi 530 melting point apparatus.  $^1\text{H}$  NMR and  $^{13}\text{C}$  NMR spectra were recorded using Bruker 300 MHz or Varian 500 MHz. Chemical shifts are given in ppm and coupling constants (J) in Hz. UV absorption spectra were obtained on UVIKON 933 Double Beam UV/VIS Spectrometer. Fluorescence emission spectra were obtained using RF-5301/PC Spectrofluorophotometer (Shimadzu)

## Cell culture.

HeLa cells (human epithelial adenocarcinoma) were purchased from Korean Cell Line Bank (Seoul, Korea). Cells were grown in DMEM (Dulbecco Modified Eagle Medium) supplemented with 10 % heat-inactivated fetal bovine serum, 100 U/mL penicillin and 100 U/mL streptomycin. All cells were maintained in an incubator at 37°C and 5% CO<sub>2</sub>/air environment.

## Confocal microscopy imaging.

Cells were seeded in a 35-mm glass bottomed dishes at a density of  $3 \times 10^5$  cells per dish in DMEM media. After overnight culture, HeLa cells were incubated with 1 mM NEM (N-ethylmaleimide) for 30 min and washed with DPBS and incubated with 300  $\mu\text{M}$  cysteine, homocysteine, GSH-MEE for 30 min. After washing with DPBS, cells were incubated with 3  $\mu\text{M}$  probe **1** for 30 min and fluorescence images were acquired by confocal laser microscopy (Fluoview 1200, Olympus, Japan). Fluorescence images were acquired by excitation at 473 nm laser diode and detected at BA 490 - 590 nm. Except for overnight culture, cell experiments were tested in HBSS (Hanks' balanced salt solution) media.

## Cytotoxicity experiments

Cells were seeded in a 96-well plate with culture media. After overnight culture, cells were incubated with probe **1** for 24 h at 37 °C. After washing with DPBS, 0.5 mg/mL of MTT (3-(4,5-Dimethylthiazol-2-yl)-2,5-Diphenyltetrazolium Bromide, Sigma) containing media was added to the cells for 4 h at 37 °C and the produced formazan was dissolved in 0.1 mL of dimethylsulfoxide (DMSO) and read at OD 650 nm with a Spectramax Microwell plate reader. All experiments were presented as the mean  $\pm$  SD from three independent experiments.

**Synthesis of probe 1.** To a solution of 4-aminothiophenol (125 mg, 1.0 mm) and triethylamine (303 mg, 3.0 mm) in dry THF (20 mL), 4-chloro-7-nitrobenzo[c][1,2,5]thiadiazole (215 mg, 1.0 mm) was added. The mixture was refluxed for 4 h under nitrogen atmosphere. After cooling to room temperature, the solvent was removed, and washed with water and extracted with dichloromethane. The crude

product was purified by column chromatography (eluent: hexane/ dichloromethane 1: 1), affording the desired product. Yield, 93%. mp 182°C (dec.);  $^1\text{H}$  NMR (300 MHz,  $\text{CDCl}_3$ )  $\delta$  6.66 (d, 1H), 6.83 (d, 2H), 7.22 (d, 2H), 8.24 (d, 1H), 4.10 ( $\text{NH}_2$ );  $^{13}\text{C}$  NMR (75 MHz,  $\text{CDCl}_3$ )  $\delta$  149.36, 148.34, 145.12, 142.55, 137.22, 130.83, 120.82, 116.43, 112.31; FAB-MS  $m/z$  = 305.9  $[\text{M}+\text{H}]^+$ , calcd for  $\text{C}_{12}\text{H}_8\text{N}_4\text{O}_2\text{S}_2$  = 304.35.

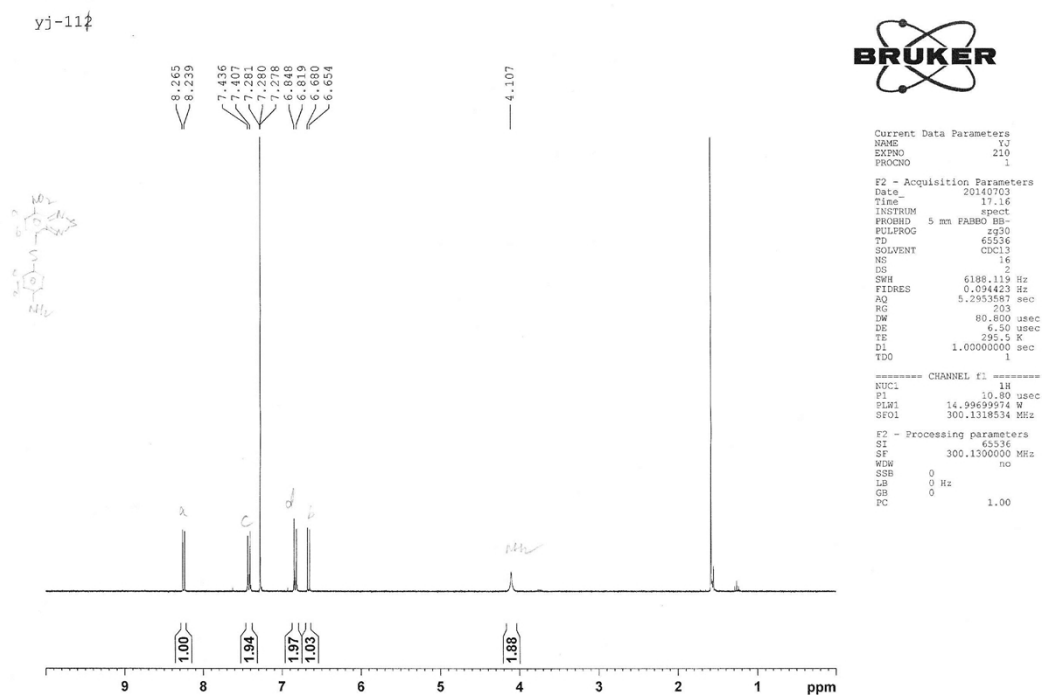

**Figure S1.**  $^1\text{H}$  NMR (300 MHz) of compound probe **1** in  $\text{CDCl}_3$ .

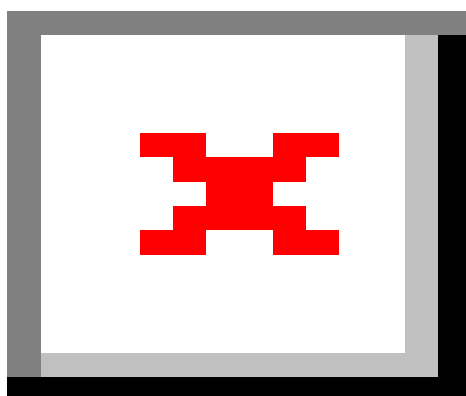

**Figure S2.**  $^{13}\text{C}$  NMR (75 MHz) of compound probe **1** in  $\text{CDCl}_3$ .

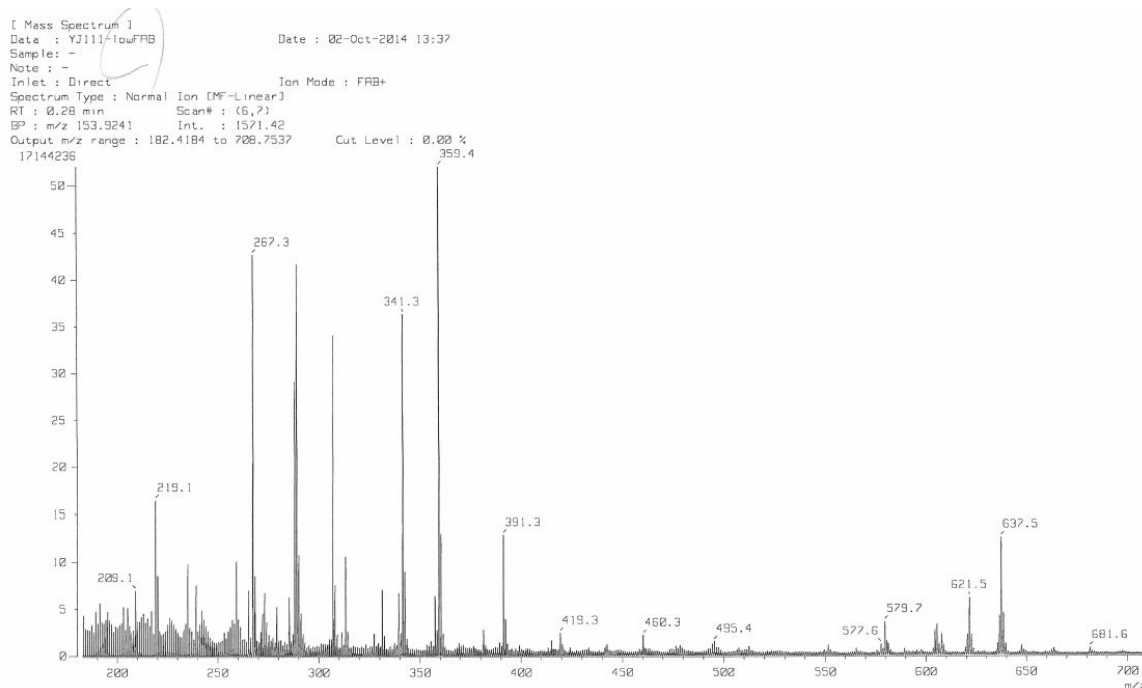

**Figure S3.** The FAB mass spectrum of probe **1**.

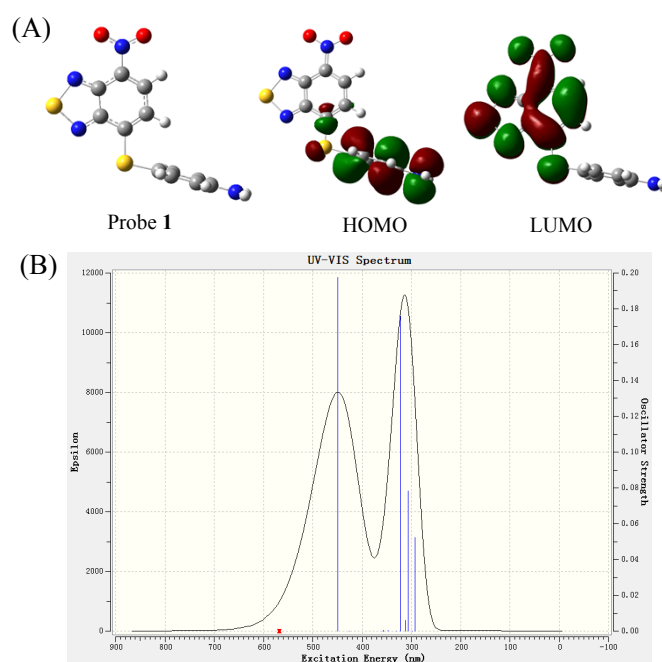

| Compound       | Excited state | $\lambda/\text{nm}$ [eV] | Osc. str ( $f$ ) | Major contributions             |
|----------------|---------------|--------------------------|------------------|---------------------------------|
| <b>Probe 1</b> | $S_2$         | 448.86 [3.86]            | 0.1977           | HOMO-2 $\rightarrow$ LUMO (70%) |
|                | $S_8$         | 321.06 [2.76]            | 0.1759           | HOMO-8 $\rightarrow$ LUMO (68%) |

**Figure S4.** Frontier molecular orbital profiles and optimized structures (bottom) based on TD-DFT (B3LYP/6-31G\*) calculations of probe **1**.

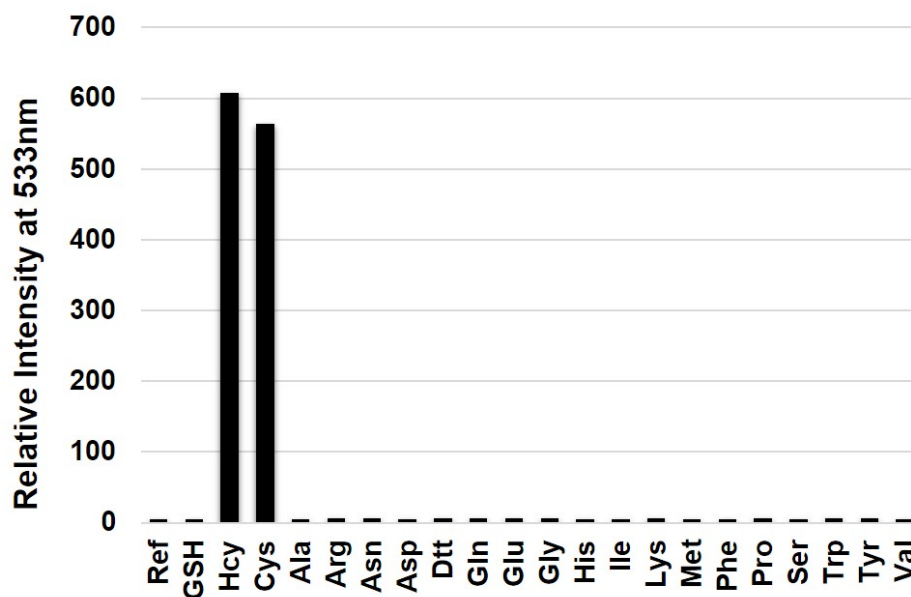

**Figure S5.** Selective Response of probe **1** to Cys & HCy. Relative fluorescence intensities of probe **1** (10  $\mu$ M) upon addition of 10 equiv. of various amino acids or GSH in HEPES (0.01M, pH 7.4) containing 1% DMSO at 533nm. (Excitation wavelength: 475nm)

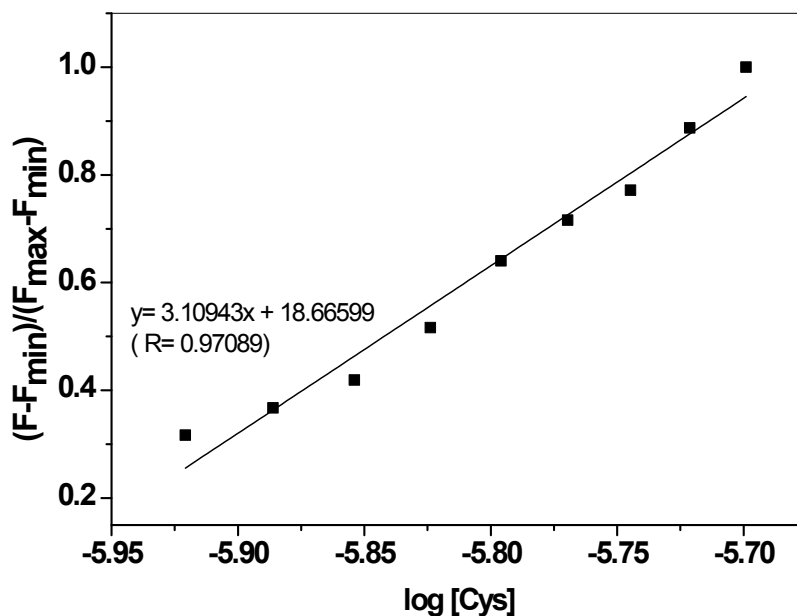

**Figure S6.** Normalized fluorescence responses of probe **1** (1  $\mu$ M) to changing Cys concentrations in DMSO-HEPES (0.01 M, pH 7.4) (1:99, v/v). (Detection limit =  $9.93056 \times 10^{-7}$  M)

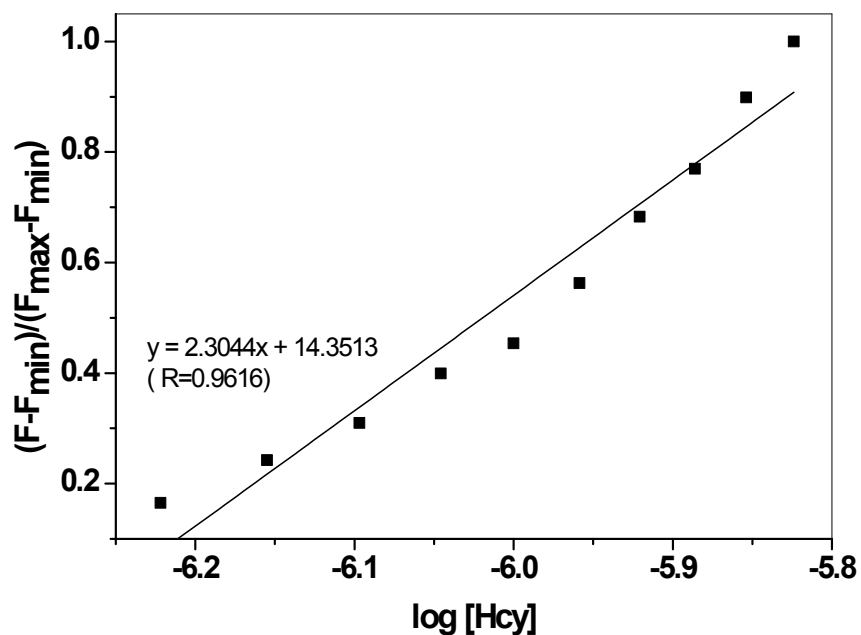

**Figure S7.** Normalized fluorescence responses of probe **1** (1  $\mu\text{M}$ ) to changing Hcy concentrations in DMSO-HEPES (0.01M, pH 7.4) (1:99, v/v). (Detection limit =  $5.91741 \times 10^{-7}\text{M}$ )

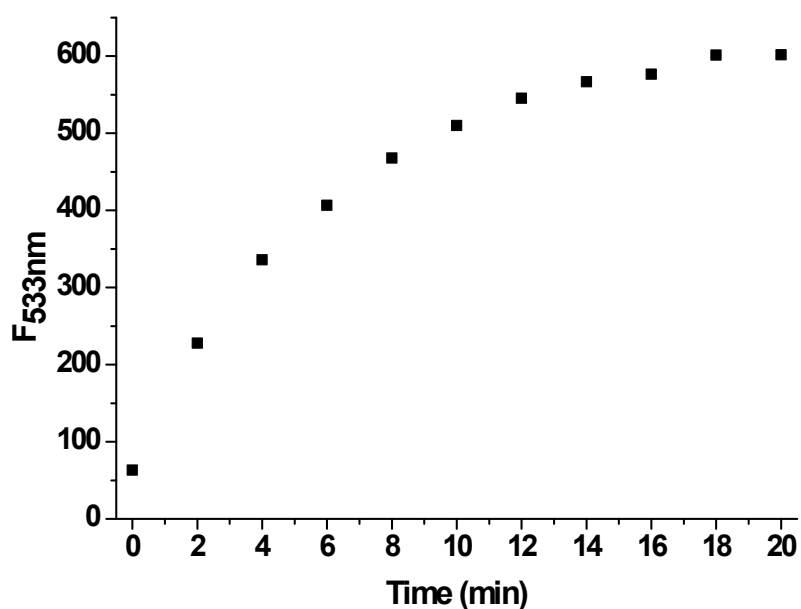

**Figure S8.** Time-dependent change of probe **1** (10  $\mu\text{M}$ ) with the addition of 10 equiv. of Cys in DMSO-HEPES (0.01 M, pH 7.4) (1:99, v/v). (Excitation wavelength: 475 nm) (Slit:  $3 \times 5$  nm)

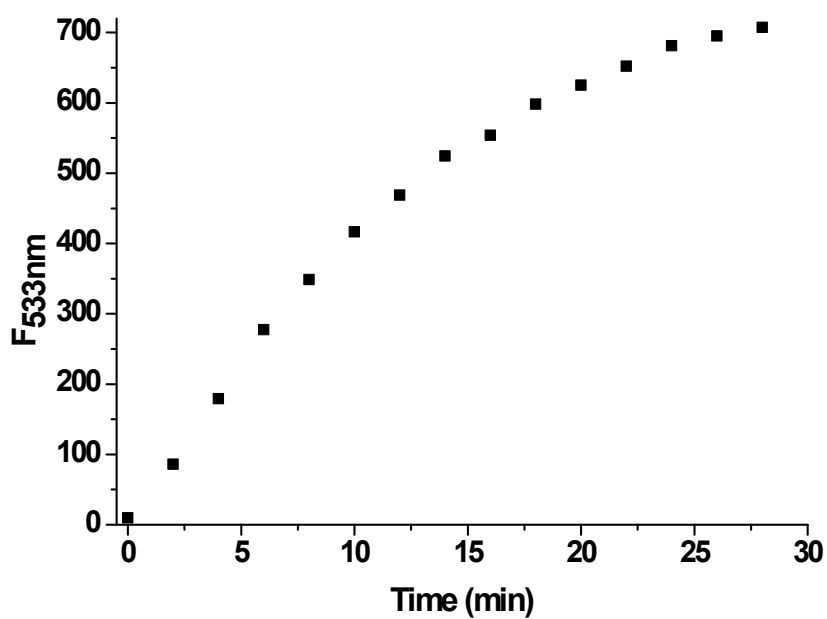

**Figure S9.** Time-dependent change of probe **1** (10  $\mu\text{M}$ ) with the addition of 10 equiv. of Hcy in DMSO-HEPES (0.01M, pH 7.4) (1:99, v/v). (Excitation wavelength: 475 nm) (Slit:  $3 \times 5$  nm)

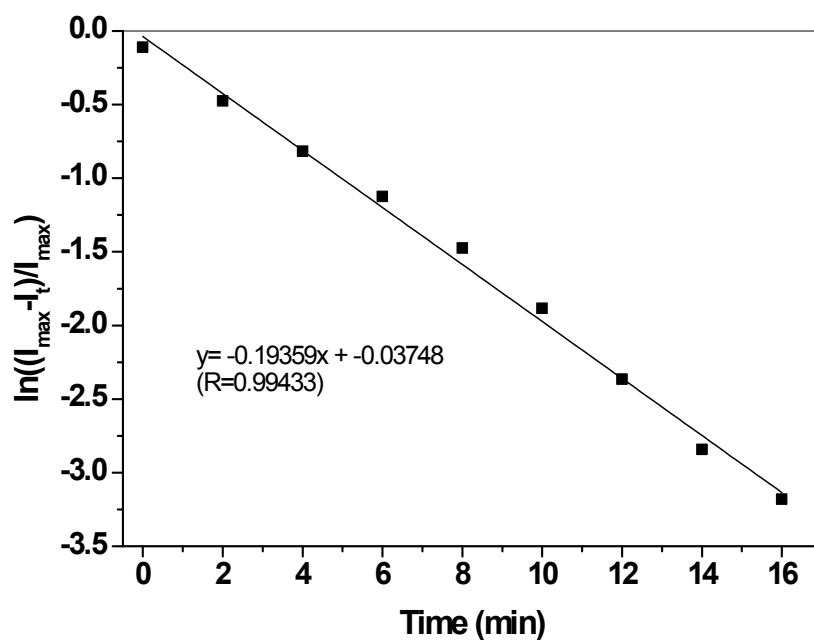

**Figure S10.** Pseudo first-order kinetic plot of probe **1** (10  $\mu\text{M}$ ) with the addition of 10 equiv. of Cys in DMSO-HEPES (0.01 M, pH 7.4) (1:99, v/v). (slope = - 0.19459, so  $K' = 0.19359 \text{ min}^{-1}$ )

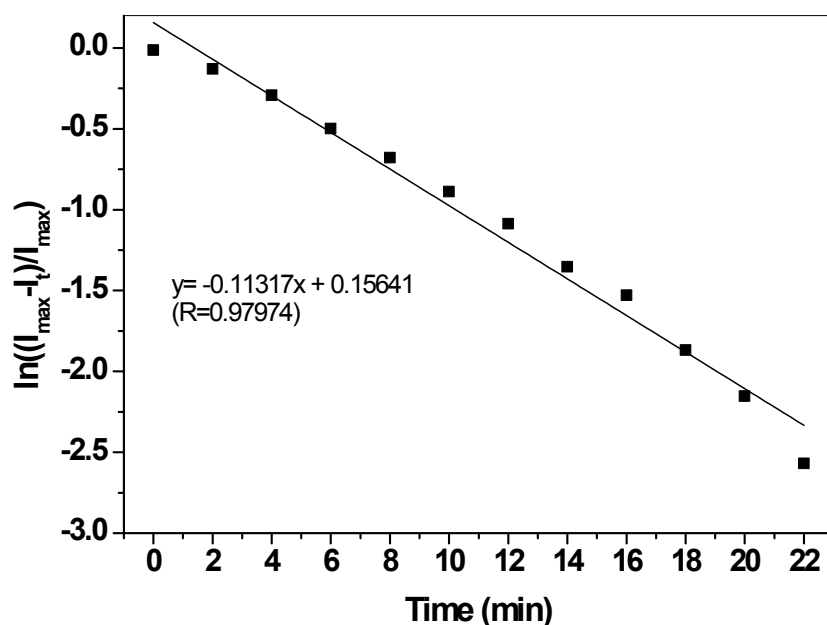

**Figure S11.** Pseudo first-order kinetic plot of probe **1** (10  $\mu\text{M}$ ) with the addition of 10 equiv. of Hcy in DMSO-HEPES (0.01 M, pH 7.4) (1:99, v/v). (slope = - 0.11317, so  $K' = 0.11317 \text{ min}^{-1}$ )

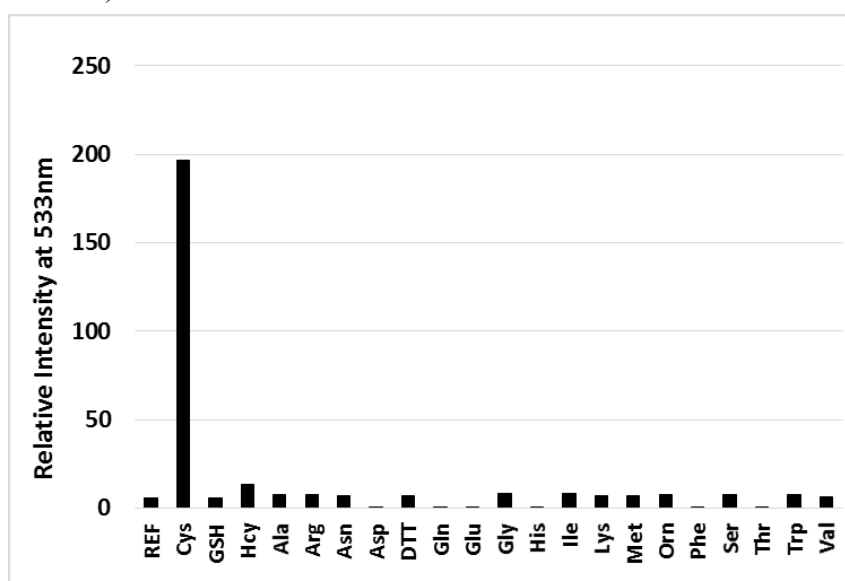

**Figure S12.** Selective Response of probe **1** to Cys. Relative fluorescence intensities of probe **1** (10  $\mu\text{M}$ ) upon addition of 10 equiv. of various amino acids or Hcy or GSH in citric acid- $\text{Na}_2\text{HPO}_4$  (0.01M, pH 6.0) containing 1% DMSO at 533nm. (Excitation wavelength: 475nm)

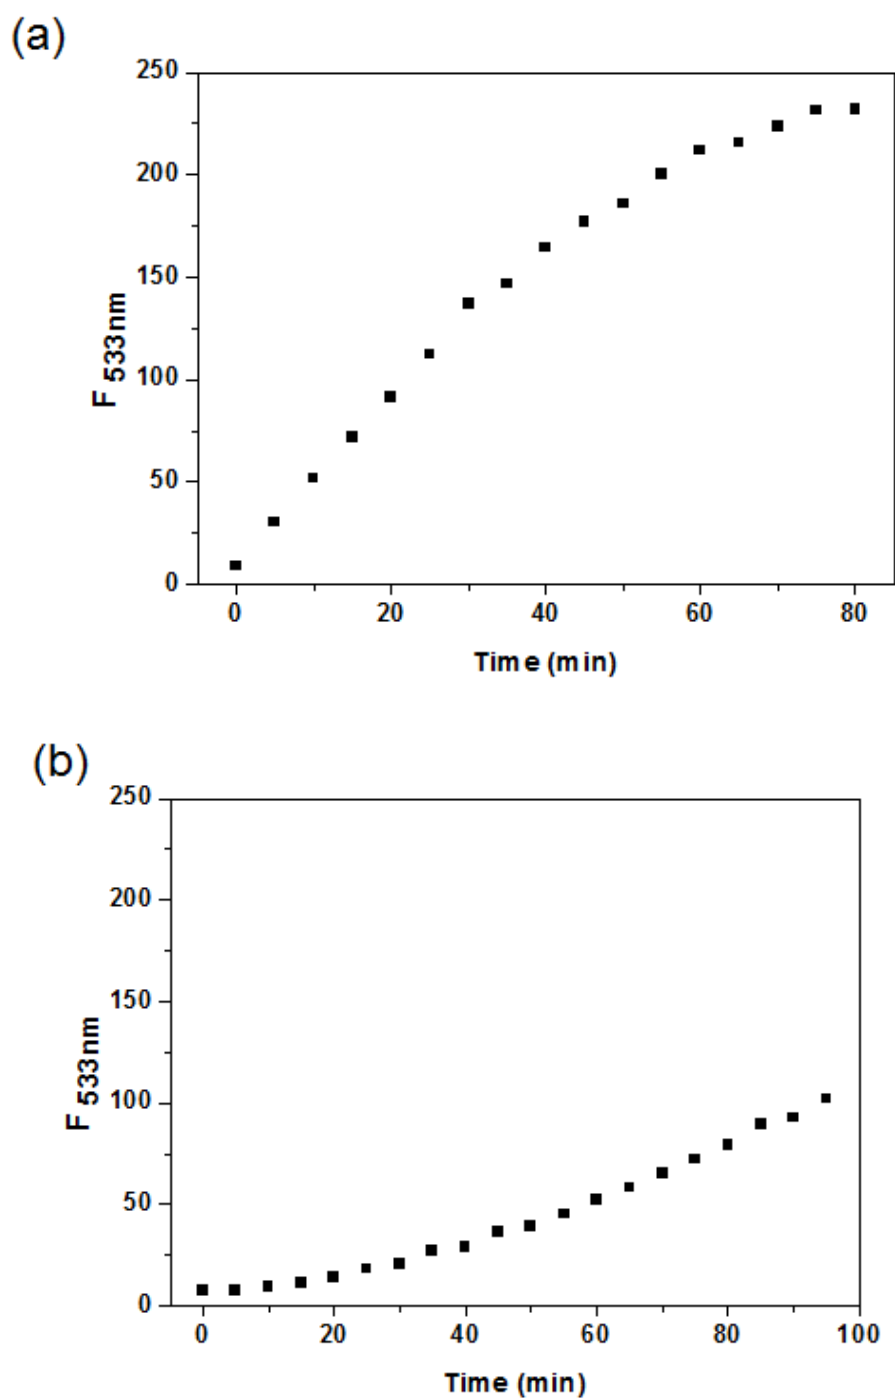

**Figure S13.** (a) Time-dependent change of probe **1** (10  $\mu\text{M}$ ) with the addition of 10 equiv. of Cys in citric acid- $\text{Na}_2\text{HPO}_4$  (0.01M, pH 6.0) containing 1% DMSO. (Excitation wavelength: 475 nm) (Slit:  $3\times 5$  nm) (b) Time-dependent change of probe **1** (10  $\mu\text{M}$ ) with the addition of 10 equiv. of Hcy in citric acid- $\text{Na}_2\text{HPO}_4$  (0.01M, pH 6.0) containing 1% DMSO. (Excitation wavelength: 475 nm) (Slit:  $3\times 5$  nm)

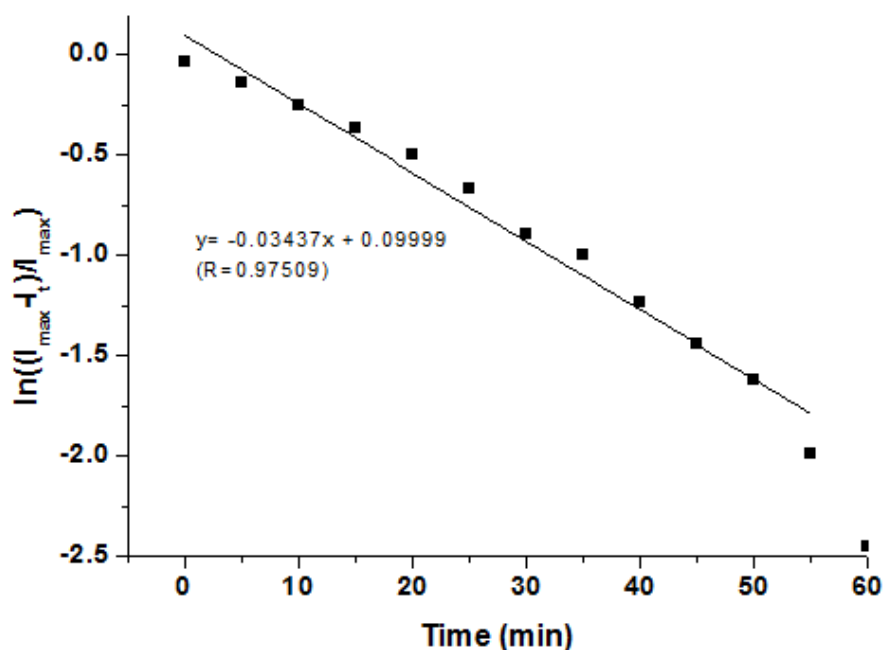

**Figure S14.** Pseudo first-order kinetic plot of probe **1** (10 μM) with the addition of 10 equiv. of Cys in citric acid- $\text{Na}_2\text{HPO}_4$  (0.01M, pH 6.0) containing 1% DMSO. (slope = -0.03437, so  $K' = -0.03437 \text{ min}^{-1}$ )

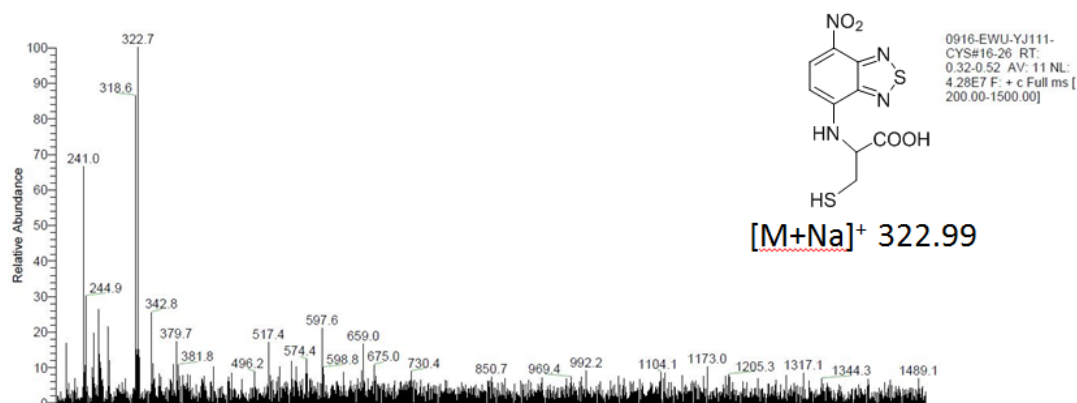

**Figure S15.** The ESI mass spectrum of probe **1**+Cys.

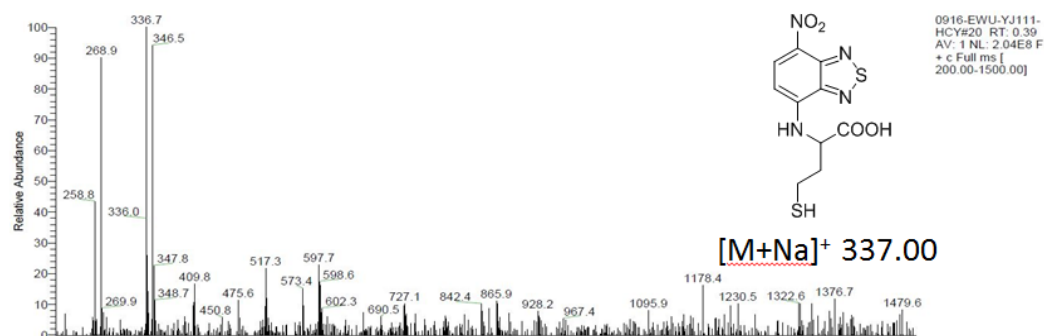

**Figure S16.** The ESI mass spectrum of probe **1**+Hcy.

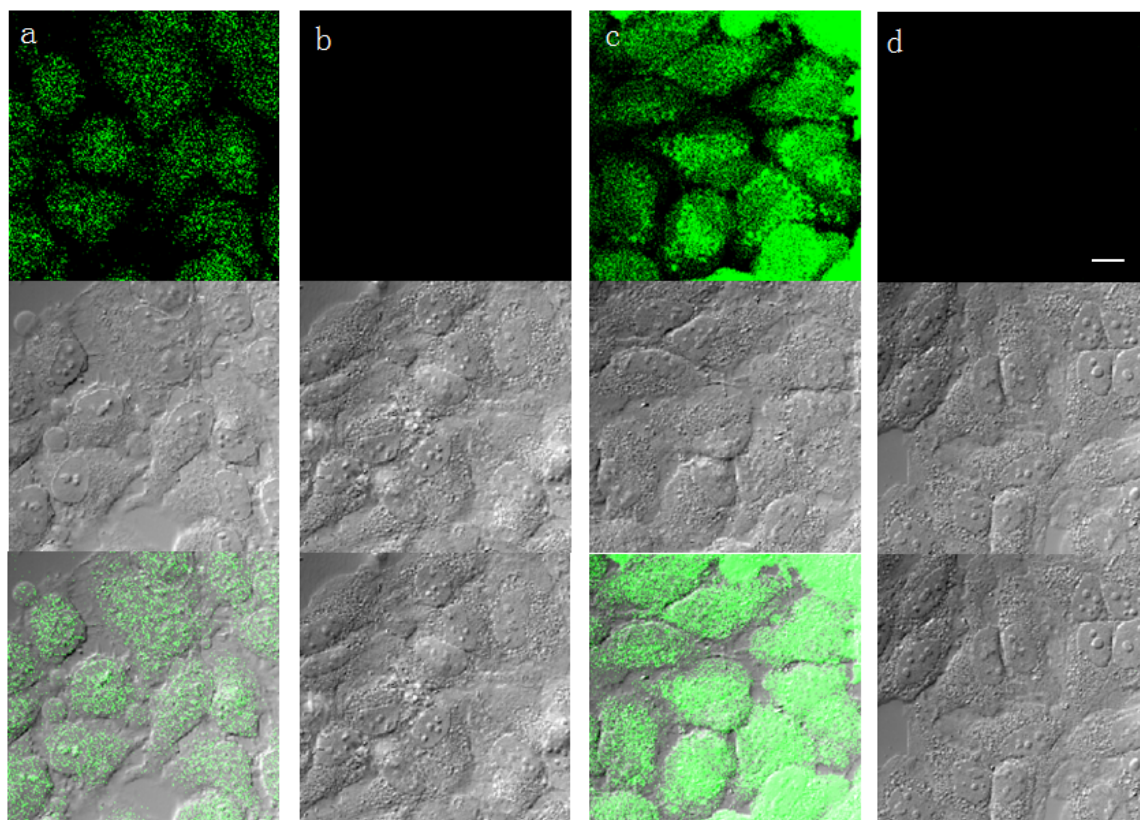

**Figure S17.** Fluorescence property of probe **1**. HeLa cells were incubated with 1 mM NEM for 30 min and incubated with 300  $\mu$ M cysteine or homocysteine for 30min in HBSS. And cells were incubated with 3  $\mu$ M probe **1** for 10 min in 10 mM citric acid/ $\text{Na}_2\text{HPO}_4$  pH 6.0 buffer. Only probe **1** (a), NEM (b), NEM + cysteine (c) and NEM + homocysteine (d). ex: 473 nm, em: 490-590 nm, upper: fluorescence image, middle: DIC, bottom: merge. Scale bar: 10  $\mu$ m.

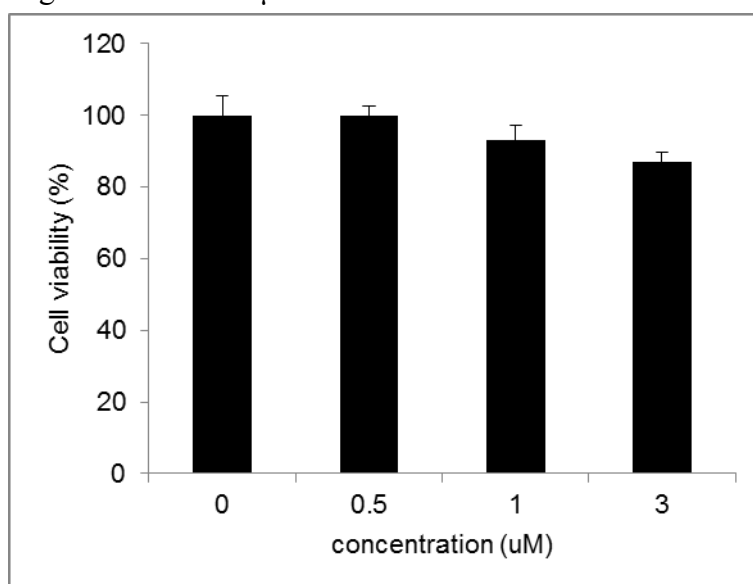

**Figure S18.** Cytotoxic effect of probe **1**. HeLa cells were incubated with each concentration of probe **1** for 24 h. Cell viability was measured by MTT assay. Results were expressed as mean  $\pm$  standard deviation of three independent experiments.
